# Supplementary material for: Epidemiology of physical–mental multimorbidity and its impact among Aboriginal and Torres Strait Islander in Australia: a cross-sectional analysis of a nationally representative sample
Source: HighWire-hosted journal article supplement (doi:10.1136/bmjopen-2021-054999), 2022-10-01
Supplement: bmjopen-2021-054999supp001_data_supplement.pdf [file bmjopen-2021-054999supp001_data_supplement.pdf]

**APPENDIX**

Appendix Table 1. Sample averages for outcome measures by Indigenous status

| Population average for outcome measures                            | Aboriginal and Torres Strait Islander | Non-Indigenous Australians |
|--------------------------------------------------------------------|---------------------------------------|----------------------------|
| Proportion to see GP in past 12/12 (%)                             | 84.00                                 | 84.95                      |
| Average Number of GP visits past 12/12 (visits)                    | 6.67                                  | 4.82                       |
| Proportion to see Specialist past 12/12 (%)                        | 27.59                                 | 30.41                      |
| Proportion with Day Hospital admission past 12/12 (%)              | 12.17                                 | 12.78                      |
| Mean Number of day hospital admissions past 12/12 (visits)         | 0.66                                  | 0.22                       |
| Proportion with overnight admission past 12/12 (%)                 | 16.70                                 | 12.87                      |
| Mean number of overnight admissions                                | 0.28                                  | 0.19                       |
| Mean number of nights in Hospital (visits)                         | 0.95                                  | 0.92                       |
| Proportion with Polypharmacy (%)                                   | 11.65                                 | 8.92                       |
| Mean number of prescription medications (meds)                     | 1.47                                  | 1.37                       |
| Proportion unemployed, looking for work (%)                        | 16.65                                 | 4.44                       |
| Proportion working reduced Hours (%)                               | 38.18                                 | 30.84                      |
| Mean Sick leave Days past 12/12 (days)                             | 1.56                                  | 1.99                       |
| Mean Unpaid leave days past 12/12 (days)                           | 1.16                                  | 1.72                       |
| Proportion with difficulty at work due to health or disability (%) | 20.79                                 | 8.27                       |
| Mean SF6D Score (0-1 decimal)                                      | 0.707                                 | 0.751                      |
| Proportion with Health Status as Fair or Poor (%)                  | 29.09                                 | 18.41                      |
| Proportion on Disability Support Pension (%)                       | 11.18                                 | 3.89                       |
| Proportion with Self-Reported Disability (%)                       | 41.65                                 | 29.80                      |
| Proportion with High Psychological Distress Risk (%)               | 32.27                                 | 18.41                      |

Note: authors estimates; sample averages and proportions were calculated using weights

Appendix Table 2. Statistical Analysis

| <b>Outcome Type</b> | <b>Outcome</b>                                                                                                                                    | <b>Statistical Method</b>                  |
|---------------------|---------------------------------------------------------------------------------------------------------------------------------------------------|--------------------------------------------|
| Health              | SF6D Score                                                                                                                                        | Multivariable Linear Regression            |
|                     | Psychological Distress Risk<br>Disability Support Pension<br>Health Status<br>Disability                                                          | Multivariable Logistic Regression          |
| Health Service Use  | Any GP appointment<br>Any Hospital Admission<br>Any Day Hospital Admission<br>Any Specialist Appointment<br>Polypharmacy (>5 regular medications) | Multivariable Logistic Regression          |
|                     | Number of GP appointments<br>Number of regular medications<br>Number of Hospital admissions                                                       | Multivariable Negative Binomial Regression |
| Work Productivity   | Employment Status<br>Full or Part Time Hours                                                                                                      | Multivariable Logistic Regression          |
|                     | Number of sick Days<br>Number of unpaid leave Days                                                                                                | Multivariable Negative Binomial Regression |

Appendix Figure 1. Flow Chart

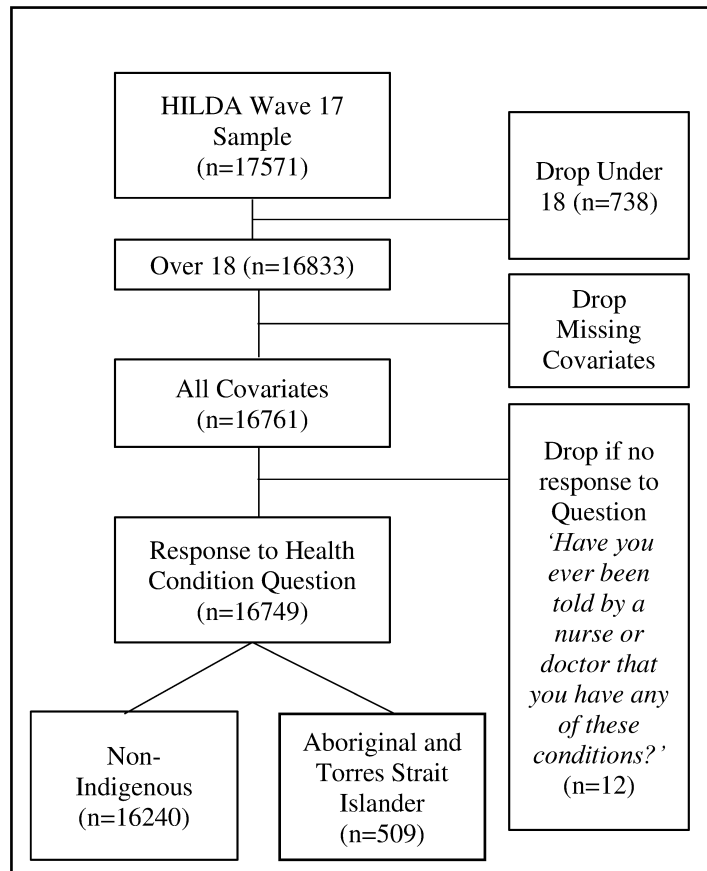

Appendix Table 3. Sample Characteristics, Indigenous status

|                                  | Aboriginal and Torres Strait<br>Islander<br>n (%) | Non-Indigenous<br>Australians<br>n (%) |
|----------------------------------|---------------------------------------------------|----------------------------------------|
| Overall                          | 509 (100)                                         | 16240 (100)                            |
| Multimorbidity                   |                                                   |                                        |
| Zero NCDs                        | 235 (45.24)                                       | 8348 (53.17)                           |
| Single NCD                       | 154 (30.57)                                       | 4398 (26.12)                           |
| 2 NCDs                           | 60 (10.65)                                        | 2039 (11.75)                           |
| 3 NCDs                           | 35 (8.44)                                         | 881 (5.32)                             |
| 4 NCDs                           | 25 (5.1)                                          | 574 (3.64)                             |
| Multimorbid (No/Yes)             |                                                   |                                        |
| Not Multimorbid                  | 389 (75.81)                                       | 12476 (79.30)                          |
| Multimorbid                      | 120 (24.19)                                       | 3494 (20.70)                           |
| Gender                           |                                                   |                                        |
| Male                             | 229 (45.12)                                       | 7651 (48.87)                           |
| Female                           | 280 (54.88)                                       | 8589 (51.13)                           |
| Age                              |                                                   |                                        |
| 18-29                            | 230 (39.31)                                       | 3630 (21.55)                           |
| 30-39                            | 93 (19.33)                                        | 2841 (17.94)                           |
| 40-49                            | 78 (16.34)                                        | 2628 (17.75)                           |
| 50-59                            | 63 (14.21)                                        | 2690 (16.30)                           |
| 60-69                            | 29 (5.77)                                         | 2229 (13.52)                           |
| 70+                              | 16 (5.04)                                         | 2222 (12.94)                           |
| Marital status                   |                                                   |                                        |
| Married/De Facto                 | 265 (43.92)                                       | 10761 (62.98)                          |
| Single/Never Married or De Facto | 188 (42.63)                                       | 3217 (23.75)                           |
| Former Married/De Facto          | 56 (13.45)                                        | 2262 (13.26)                           |
| Education Level                  |                                                   |                                        |
| <Year 12 Schooling               | 198 (35.95)                                       | 3642 (21.25)                           |
| Year 12/Certificate/Diploma      | 265 (54.59)                                       | 8060 (49.37)                           |
| Bachelors or Higher              | 46 (9.46)                                         | 4538 (29.38)                           |
| Employment Status                |                                                   |                                        |
| Employed Full Time               | 153 (28.63)                                       | 7173 (44.83)                           |
| Employed Part Time               | 80 (17.69)                                        | 3318 (19.99)                           |
| Not employed                     | 73 (9.3)                                          | 530 (3.20)                             |
| Not in workforce                 | 201 (44.38)                                       | 5193 (32.17)                           |
| Annual income                    |                                                   |                                        |
| 1st quantile (lowest)            | 173 (24.45)                                       | 4016 (20.20)                           |
| 2nd quantile                     | 161 (30.02)                                       | 4026 (24.03)                           |
| 3rd quantile                     | 115 (26.33)                                       | 4071 (25.86)                           |
| 4th quantile (highest)           | 60 (19.21)                                        | 4127 (29.92)                           |
| Region                           |                                                   |                                        |
| Urban                            | 226 (49.08)                                       | 10815 (72.88)                          |
| Regional                         | 271 (49.31)                                       | 5190 (25.98)                           |
| Remote                           | 12 (1.61)                                         | 235 (1.14)                             |
| State                            |                                                   |                                        |
| New South Wales                  | 136 (29.50)                                       | 4739 (32.25)                           |
| Victoria                         | 70 (13.75)                                        | 4181 (26.44)                           |
| Queensland                       | 170 (33.23)                                       | 3413 (19.41)                           |
| South Australia                  | 46 (6.91)                                         | 1486 (7.17)                            |
| Western Australia                | 28 (7.13)                                         | 1451 (10.31)                           |
| Tasmania                         | 45 (7.06)                                         | 503 (2.04)                             |
| Northern Territory               | 5 (1.3)                                           | 122 (0.71)                             |
| Australian Capital Territory     | 9 (1.12)                                          | 345 (1.67)                             |
| Country of birth                 |                                                   |                                        |
| Australia                        | 509 (100)                                         | 12645 (68.92)                          |
| Other                            | 0 (0)                                             | 3595 (31.08)                           |
| Private health                   |                                                   |                                        |
| No                               | 423 (78.36)                                       | 7672 (46.54)                           |
| Yes                              | 86 (21.64)                                        | 8568 (53.46)                           |

Note: authors estimates; proportions were calculated using weights

Appendix Figure 2. Prevalence of multimorbidity by type and Indigenous status

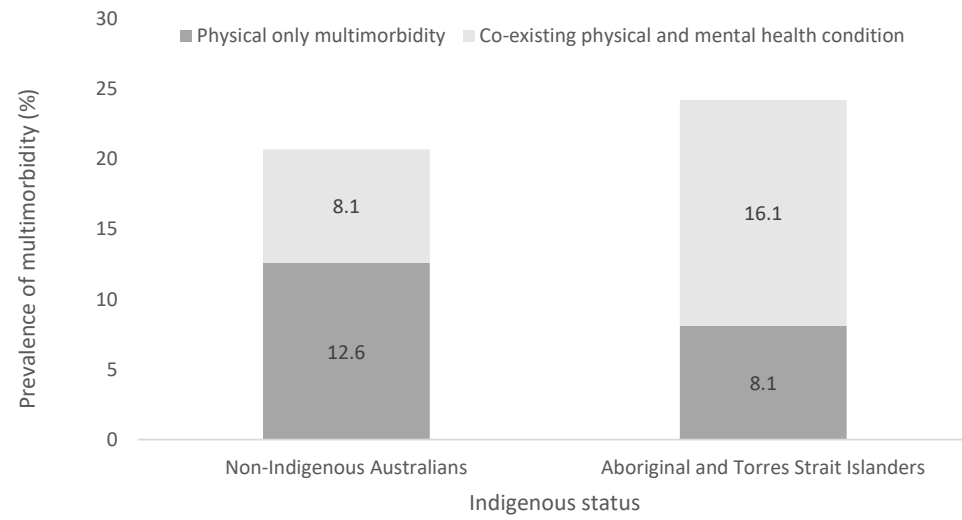

*Note:* authors estimates; proportions were calculated using weights

Appendix Figure 3. Common combinations of NCDs by indigenous status

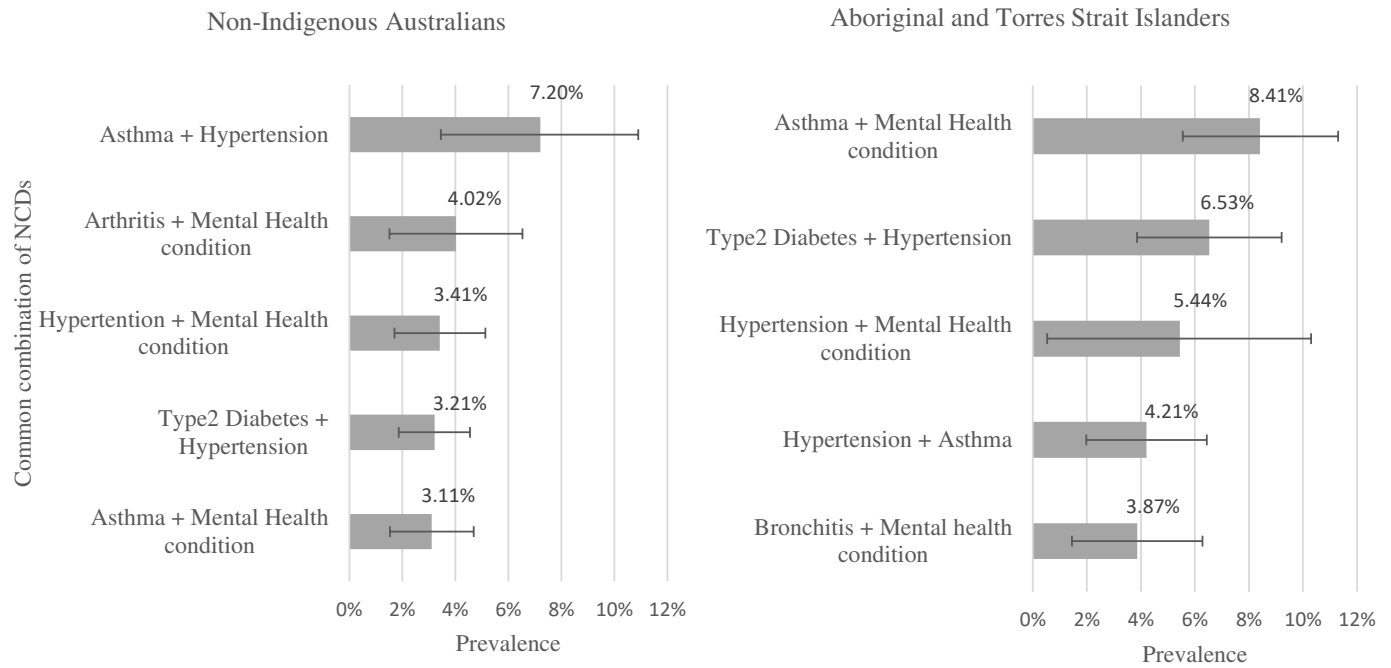

Note: authors estimates; proportions were calculated using weights

Appendix Table 4. Health service use and multimorbidity

|                                    | Pooled sample |              |                  | Non-Indigenous |              | Aboriginal and Torres Strait Islander |              |
|------------------------------------|---------------|--------------|------------------|----------------|--------------|---------------------------------------|--------------|
|                                    | OR (95%CI)    |              | Interaction term | OR (95%CI)     |              | OR (95%CI)                            |              |
| Any GP visit                       | 2.70***       | (2.50, 2.92) | 0.92             | 2.70***        | (2.50, 2.93) | 3.34***                               | (2.15, 5.17) |
| Any specialist appointment         | 1.62***       | (1.48, 1.77) | 0.85**           | 1.62***        | (1.48, 1.77) | 1.64***                               | (1.32, 2.04) |
| Any day hospital admit             | 1.28***       | (1.22, 1.35) | 0.92             | 1.28***        | (1.22, 1.35) | 1.32                                  | (0.93, 1.88) |
| Any overnight hospital admit       | 1.52***       | (1.46, 1.58) | 0.97             | 1.52***        | (1.46, 1.58) | 1.65**                                | (1.17, 2.32) |
| Polypharmacy                       | 2.86***       | (2.75, 2.97) | 1.21             | 2.87***        | (2.76, 2.99) | 3.81***                               | (2.50, 5.80) |
|                                    | Coef. (95%CI) |              | Interaction term | Coef. (95%CI)  |              | Coef. (95%CI)                         |              |
| Number of GP visit                 | 0.37***       | (0.30, 0.44) | -0.06            | 0.37***        | (0.30, 0.44) | 0.39**                                | (0.13, 0.64) |
| Number of day hospital admit       | 0.37***       | (0.21, 0.53) | 0.69             | 0.37***        | (0.23, 0.52) | 0.37**                                | (0.09, 0.66) |
| Number of overnight hospital admit | 0.40***       | (0.38, 0.43) | -0.02            | 0.40***        | (0.37, 0.43) | 0.49***                               | (0.31, 0.67) |
| Number of nights inpatient         | 0.52***       | (0.43, 0.61) | -0.31***         | 0.52***        | (0.43, 0.60) | 0.64***                               | (0.41, 0.86) |
| Number of prescription medication  | 0.55***       | (0.45, 0.65) | 0.01             | 0.55***        | (0.45, 0.65) | 0.55**                                | (0.13, 0.96) |

Note: \*\*\* p<0.01, \*\* p<0.05

OR = Odds Ratio, Coef. = Coefficient

authors estimates; ORs and Coefficients were calculated using weights

Interaction of number of multimorbidity and Indigenous status

Appendix Table 5. Productivity loss and multimorbidity

|                            | Pooled sample |              |                  | Non-Indigenous |              | Aboriginal and Torres Strait Islander |               |
|----------------------------|---------------|--------------|------------------|----------------|--------------|---------------------------------------|---------------|
|                            | OR (95%CI)    |              | Interaction term | OR (95%CI)     |              | OR (95%CI)                            |               |
| Labour force participation | 0.61***       | (0.58, 0.65) | 1.08             | 0.61***        | (0.58, 0.65) | 0.67                                  | (0.44, 1.01)  |
| Reduced work hours         | 1.08          | (0.95, 1.23) | 0.96             | 1.08           | (0.95, 1.23) | 1.15                                  | (0.65, 2.01)  |
|                            | Coef. (95%CI) |              | Interaction term | Coef. (95%CI)  |              | Coef. (95%CI)                         |               |
| Number of sick leave       | 0.25***       | (0.19, 0.31) | -0.12            | 0.25***        | (0.19, 0.31) | 0.21                                  | (-0.14, 0.55) |
| Number of unpaid leave     | 0.10***       | (0.06, 0.15) | 0.19             | 0.10***        | (0.06, 0.14) | 0.80**                                | (0.08, 1.53)  |

Note: \*\*\* p<0.01, \*\* p<0.05

OR = Odds Ratio, Coef. = Coefficient

authors estimates; ORs and Coefficients were calculated using weights



Appendix Table 6. Multimorbidity and health, disability, wellbeing

|                             | Pooled sample |                |                  | Non-Indigenous |                | Aboriginal and Torres Strait Islander |                |
|-----------------------------|---------------|----------------|------------------|----------------|----------------|---------------------------------------|----------------|
|                             | OR (95%CI)    |                | Interaction term | OR (95%CI)     |                | OR (95%CI)                            |                |
| Self-recorded health        | 2.06***       | (1.99, 2.12)   | 1.03             | 2.06***        | (1.99, 2.12)   | 2.36**                                | (1.35, 4.13)   |
| Disability support pension  | 1.39***       | (1.31, 1.48)   | 0.92             | 1.40***        | (1.30, 1.51)   | 1.60                                  | (0.66, 3.86)   |
| Health problem/disabilities | 2.61***       | (2.31, 2.95)   | 1.16             | 2.61***        | (2.31, 2.95)   | 4.13**                                | (1.76, 9.70)   |
| Raised psychological risk   | 1.79***       | (1.50, 2.14)   | 0.92             | 1.80***        | (1.49, 2.16)   | 1.77**                                | (1.18, 2.68)   |
|                             | Coef. (95%CI) |                | Interaction term | Coef. (95%CI)  |                | Coef. (95%CI)                         |                |
| Sf6D score                  | -0.04***      | (-0.05, -0.04) | 0.01             | -0.04***       | (-0.05, -0.04) | -0.04***                              | (-0.06, -0.02) |

Note: \*\*\* p<0.01, \*\* p<0.05

OR = Odds Ratio, Coef. = Coefficient

authors estimates; ORs and Coefficients were calculated using weights
